# Supplementary material for: Solid-State Lithium Batteries with Cathode-Supported Composite Solid Electrolytes Enabling High-Rate Capability and Excellent Cyclic Performance
Source: MDPI journal article supplement (doi:10.3390/batteries9100490), 2023-09-26
Supplement: s1 [file s1]

## Supplementary information

**Table S1:** A comparison table of ionic conductivity based on PEO solid-state electrolyte.

| Polymer electrolyte        | Ionic conductivity (S/cm)    | Ref.      |
|----------------------------|------------------------------|-----------|
| PEO/LiTFSI/LAGP            | $6.76 \times 10^{-4}$ (25°C) | [S1]      |
| PEO/LiTFSI /LLZO nanowires | $2.39 \times 10^{-4}$ (25°C) | [S2]      |
| PEO/LiTFSI/LLTO-nanowires  | $5.53 \times 10^{-5}$ (25°C) | [S3]      |
| PEO/LiTFSI/LATP            | $2.08 \times 10^{-4}$ (25°C) | This work |
| PEO/LiTFSI/LLZTO           | $1.64 \times 10^{-4}$ (25°C) | This work |

PEO: polyethylene oxide; LiTFSI: lithium bis(trifluoromethane) sulfonimide; LAGP:  $\text{Li}_{1.5}\text{Al}_{0.5}\text{Ge}_{1.5}(\text{PO}_4)_3$ ; LLZO:  $\text{Li}_7\text{La}_3\text{Zr}_2\text{O}_{12}$ ; LLTO:  $\text{Li}_{0.33}\text{La}_{0.557}\text{TiO}_3$ ; LATP:  $\text{Li}_{1.5}\text{Al}_{0.5}\text{Ti}_{1.5}(\text{PO}_4)_3$ ; LLZTO:  $\text{Li}_{6.4}\text{La}_3\text{Zr}_{1.4}\text{Ta}_{0.6}\text{O}_{12}$

### References

- [S1] Y Zhao, Z Huang, S Chen et al, A promising PEO/LAGP hybrid electrolyte prepared by a simple method for all-solid-state lithium batteries. *Solid State Ionics* 295 (2016) 65–71.
- [S2] Wan Z, Lei D, Yang W et al, Low resistance–integrated all-solid-state battery achieved by  $\text{Li}_7\text{La}_3\text{Zr}_2\text{O}_{12}$  nanowire upgrading polyethylene oxide (PEO) composite electrolyte and PEO cathode binder, *Adv. Funct. Mater* 29 (2019) 1–10.
- [S3] L. Zhu, P.H. Zhu, Q.X. Fang, M.X. Jing, X.Q. Shen, L.Z. Yang, A novel solid PEO/LLTO-nanowires polymer composite electrolyte for solid-state lithium-ion battery, *Electrochim. Acta* 292 (2018) 718-726.
